# Supplementary material for: 18F-fluorodeoxyglucose positron emission tomography/computed tomography imaging features in patients with non-tuberculous mycobacterial infection
Source: Research Square preprint supplement (doi:10.21203/rs.3.rs-1734507/v1), 2022-06-22
Supplement: Supplementary file 2 [file 6bc7e3772fe093ef21a2bd85.docx]

| **Table 4 Comparison of clinical and 18FDG PET/CT characteristics** **among groups with different immunological states and NTM infection distribution and severity** | | | | | | | |  | | |
| --- | --- | --- | --- | --- | --- | --- | --- | --- | --- | --- |
|  | Immune state (n =23) | | | | Distribution of lesions (n =23) | | | Severity of NTM-PD (n =21) | | |
| Characteristics | [Deficiency](https://xueshu.baidu.com/usercenter/paper/show?paperid=d6ea2c24cd943534cf3141ea50c808e0&site=xueshu_se" \t "_blank) | Mildly decreased | Normal | P | Localized | Disseminated | P | Severe | Non-severe | P |
| White cell count(× 109/L ) | 6.6±5.0 | 7.9±3.9 | 10.5±5.5 | 0.301 | 8.4±4.1 | 8.6±5.3 | 0.882 | 9.4±5.6 | 7.4±3.5 | 0.354 |
| Neutrophilic granulocyte count (× 109/L ) | 5.0±4.5 | 5.8±3.9 | 8.0±5.6 | 0.435 | 5.7±4.1 | 6.8±5.1 | 0.642 | 7.2±5.6 | 5.3±2.8 | 0.378 |
| lymphocyte count(× 109/L ) | 0.8±0.4 | 1.4±1.3 | 1.6±1.0 | 0.360 | 1.5±1.4 | 1.3±0.9 | 0.620 | 1.5±1.2 | 1.1±0.5 | 0.357 |
| Red blood cell count(× 109/L ) | 3.3±0.8 | 3.8±0.9 | 4.0±0.7 | 0.318 | 3.9±0.8 | 3.7±0.8 | 0.685 | 3.7±1.0 | 3.8±0.5 | 0.945 |
| Hemoglobin (g/dl) | 96.5±24.0 | 208.5±19.9 | 117.3±24.8 | 0.348 | 117.7±25.2 | 104.9±7.1 | 0.301 | 107.0±30.4 | 111.7±20.9 | 0.692 |
| Platelet count (× 109/L ) | 226.0±112.4 | 258.8±117.8 | 302.1±124.7 | 0.479 | 225.4±115.6 | 285.4±117.9 | 0.272 | 314.0±119.3 | 194.3±73.1 | 0.007 |
| C-reactive protein (mg/L) | 49.7±38.3 | 52.7±71.9 | 54.0±51.9 | 0.990 | 19.0±10.1 | 64.9±60.4 | 0.066 | 56.3±55.1 | 42.5±56.7 | 0.569 |
| Erythrocyte sedimentation rate (mm/H) | 34.7±32.4 | 28.6±27.6 | 42.0±34.7 | 0.690 | 27.6±15.3 | 36.6±34.9 | 0.220 | 40.7±38.7 | 10.6±16.2 | 0.040 |
| The percentage of total T lymphocyte (%) | 74.2±30.8 | 38.5±31.2 | 60.6±28.1 | 0.287 | 60.9±28.6 | 63.8±27.9 | 0.880 | 69.6±23.3 | 51.6±31.8 | 0.305 |
| IL-6  TNF-α | 18.4±17.9  5.1±2.1 | 30.0±62.7  25.8±9.1 | 33.3±54.2  1.8±0.6 | 0.852  0.487 | 36.3±65.8  10.6±2.6 | 24.7±42.1  21.8±2.1 | 0.615  0.221 | 39.9±60.8  21.1±2.5 | 10.2±7.1  9.4±3.1 | 0.163  0.341 |
| Lactate dehydrogenase (U/L) | 234.0±58.2 | 197.9±72.3 | 192.4±52.1 | 0.417 | 214.9±55.9 | 200.0±64.5 | 0.626 | 217.6±68.4 | 185.9±44.3 | 0.233 |
| SUVI-lung | 3.8±2.2 | 5.9±3.4 | 8.1±4.8 | 0.146 | 5.15±3.55 | 6.7±4.3 | 0.437 | 7.7±4.3 | 4.3±2.7 | 0.036 |
| SUVE-Lung | 6.1±2.8 | 3.7±2.7 | 8.9±7.7 | 0.480 | NA* | NA | NA | 8.5±7.4 | 4.5±2.1 | 0.214 |
| SUVMax | 6.7±4.7 | 6.6±3.3 | 15.2±7.9 | 0.010 | 5.5±3.4 | 12.0±7.4 | 0.005 | 10.9±6.3 | 8.6±8.3 | 0.471 |
| SURLiver | 2.6±1.5 | 2.7±.1.3 | 3.7±2.2 | 0.007 | 2.0±1.2 | 4.5±2.2 | 0.009 | 3.8±1.6 | 3.6±3.1 | 0.793 |
| SURBlood | 4.6±3.4 | 3.7±2.0 | 8.7±4.0 | 0.012 | 3.2±2.4 | 7.0±3.9 | 0.003 | 6.0±2.8 | 5.7±5.3 | 0.849 |
| SUVLiver | 2.6±0.7 | 2.6±0.6 | 2.8±0.6 | 0.751 | 2.7±0.4 | 2.6±0.7 | 0.762 | 2.7±0.6 | 2.6±0.6 | 0.586 |
| SUVMarrow | 4.0±1.8 | 3.1±1.3 | 3.9±2.7 | 0.662 | 3.0±.08 | 3.9±2.3 | 0.320 | 4.4±2.0 | 2.4±0.8 | 0.006 |
| SUVSpleen | 2.9±1.6 | 2.2±0.3 | 2.3.0.5 | 0.404 | 2.0±1.0 | 2.4±1.3 | 0.489 | 2.5±1.3 | 1.8±0.7 | 0.131 |

NA*: only one patient with localized in non-lung involved of TNM infection.
