# Supplementary material for: 18F-fluorodeoxyglucose positron emission tomography/computed tomography imaging features in patients with non-tuberculous mycobacterial infection
Source: Research Square preprint supplement (doi:10.21203/rs.3.rs-1734507/v1), 2022-06-22
Supplement: Supplementary file 3 [file f633734597b0c12d76241c1e.docx]

**Table 1** **Demographics and clinical characteristics of patients with** **NTM infection**

| Characteristics | n (range or %) |
| --- | --- |
| Sex, Male/Female | **19/4(82.6/****17.4)** |
| Age, median (interquartile range), years | **60 (14-84)** |
| Risk factor, n (%)  History of malignancy, chemotherapy period  Diffuse large B-cell lymphoma  Leukemia  MDS  History of malignancy, non-chemotherapy period  Mucosal-associated lymphoid tissue lymphoma  Adenocarcinoma of lung  Pancreatic cancer  AIDS  Splenectomy  MonoMAc syndrome  Hepatitis B cirrhosis  Tuberculosis  COPD due to long-term smoking  None | **3(13.0)**  **1(4.3)**  **1****(4.3)**  **1(4.3)**  **4(17.4)**  **1(4.3)**  **2(8.7)**  **1(4.3)**  **2(8.7)**  **2(8.7)**  **1(4.3)**  **1(4.3)**  **1(4.3)**  **6(26.1)**  **3(13.0)** |
| Presenting syndrome, n (%)  Fever (>38℃)  Cough and expectoration  Ostealgia  Fatigue  Chest tightness  Weight loss | **12(****52.2)**  **8(39.1)**  **5****(21.7)**  **2(8.7)**  **1****(4.3)**  **1(4.3)** |
| Bacterial species, n (%)  *M.* *intracellulare*  *M. Avium*  *M. Abscessus*  *M. kansasii*  *M. Paraintracellulare*  *M. chimaera* | **12(52.2)**  **4(17.4)**  **3(13.0)**  **2(8.7)**  **1(4.3)**  **1(4.3)** |
| Methods for confirming of NTM, n (%)  Tissue culture  mNGS | **9(39.1)**  **14(60.9)** |

NTM: Non-tuberculous mycobacterial; MDS: Myelodysplastic syndromes; AIDS:  Acquired immunodeficiency syndrome; COPD: Chronic obstructive pulmonary disease; mNGS: metagenomic next-generation sequencing.
